# Supplementary material
Source: publisher figshare collection journal article supplement (https://acs.figshare.com/ndownloader/files/4143058)
Supplement: Supplementary file 1 [file 4143058]

Supporting information for :

## Discrimination of 4-Hydroxyproline Diastereomers by Vibrational Spectroscopy of the Gaseous Protonated Species

Maria Elisa Crestoni,<sup>\*,†</sup> Barbara Chiavarino,<sup>‡</sup> Debora Scuderi,<sup>§</sup> Annito Di Marzio,<sup>‡</sup> Simonetta Fornarini<sup>‡</sup>

<sup>†</sup> Dipartimento di Chimica e Tecnologie del Farmaco, Università di Roma ‘‘La Sapienza’’, P. le A. Moro 5, I-00185 Roma, Italy

<sup>§</sup> Laboratoire de Chimie Physique d’Orsay, Université Paris-Sud 11, Batiment 350-Campus d’Orsay 15, avenue Jean Perrin –91405 Orsay Cedex, France

### Contents :

**Figure 1S.** Relative abundances of mass selected (a) HypH<sup>+</sup> and (b) hypH<sup>+</sup> ions (■, m/z 132) and of daughter ion (▲, m/z 86) as a function of collision energy ( $E_{CM}/eV$ ).

**Figure 2S.** Photodissociation mass spectrum of protonated (2S,4R)-4-hydroxyproline (HypH<sup>+</sup>) ions at m/z 132 before (a) and after (b) irradiation with OPO/OPA IR frequency fixed at 3550 cm<sup>-1</sup>.

**Figure 3S.** Photodissociation mass spectrum of protonated (2S,4S)-4-hydroxyproline (hypH<sup>+</sup>) ions at m/z 132 before (a) and after (b) irradiation with CLIO FEL IR frequency fixed at 1770 cm<sup>-1</sup>.

**Figure 4S.** Optimized structures and relative free energies (in parentheses) at 298 K (kJ mol<sup>-1</sup>) of protonated (2S,4R)-4-hydroxyproline (HypH<sup>+</sup>) conformers **R**-<sub>endo</sub> **Ic**, **R**-<sub>exo</sub> **IIIa**, **R**-<sub>exo</sub> **IIIb**, **R**-<sub>endo</sub> **IIa**, **R**-<sub>endo</sub> **IIc**, **R**-<sub>endo</sub> **IIIa**, **R**-<sub>endo</sub> **IIIc**, calculated at MP2/6-311+G\*\* level of theory.

**Figure 5S.** Optimized structures and relative free energies (in parentheses) at 298 K (kJ mol<sup>-1</sup>) of hypH<sup>+</sup> conformers **S**-<sub>endo</sub> **Ic**, **S**-<sub>exo</sub> **Ic**, **S**-<sub>endo</sub> **IIIa**, **S**-<sub>exo</sub> **IIa**, **S**-<sub>endo</sub> **IIIb**, **S**-<sub>exo</sub> **IIc**, **S**-<sub>exo</sub> **IIIa**, **S**-<sub>endo</sub> **IIIc**, **S**-<sub>exo</sub> **IIIc**, calculated at MP2/6-311+G\*\* level of theory. Hydrogen bond lengths, marked by dashed lines, are given in Å.

**Figure 6S.** Calculated IR spectra of protonated (2S,4R)-4-hydroxyproline (HypH<sup>+</sup>) structures **R**-<sub>endo</sub> **Ic**, **R**-<sub>exo</sub> **IIIa**, **R**-<sub>exo</sub> **IIIb**, **R**-<sub>endo</sub> **IIa**, at the MP2/6-311+G\*\* level.

**Figure 7S.** Calculated IR spectra of protonated (2S,4R)-4-hydroxyproline ( $\text{HypH}^+$ ) structures **R-<sub>endo</sub> IIc**, **R-<sub>endo</sub> IIIa**, **R-<sub>endo</sub> IIIc** at the MP2/6-311+G\*\* level.

**Figure 8S.** Calculated IR spectra of protonated (2S,4S)-4-hydroxyproline ( $\text{hypH}^+$ ) structures **S-<sub>endo</sub> Ic**, **S-<sub>exo</sub> Ic**, **S-<sub>endo</sub> IIIa**, **S-<sub>exo</sub> IIa**, **S-<sub>endo</sub> IIIb** at the MP2/6-311+G\*\* level.

**Figure 9S.** Calculated IR spectra of protonated (2S,4S)-4-hydroxyproline ( $\text{hypH}^+$ ) structures **S-<sub>exo</sub> IIc**, **S-<sub>exo</sub> IIIa**, **S-<sub>endo</sub> IIIc**, **S-<sub>exo</sub> IIIc** at the MP2/6-311+G\*\* level.

**Figure 10S.** Experimental IRMPD spectra of protonated (2S,4R)-4-hydroxyproline ( $\text{HypH}^+$ ) enlarged in the higher frequency OH stretch region, showing all data points.

**Figure 11S.** Experimental IRMPD spectra of protonated (2S,4S)-4-hydroxyproline ( $\text{hypH}^+$ ) enlarged in the higher frequency OH stretch region, showing all data points.

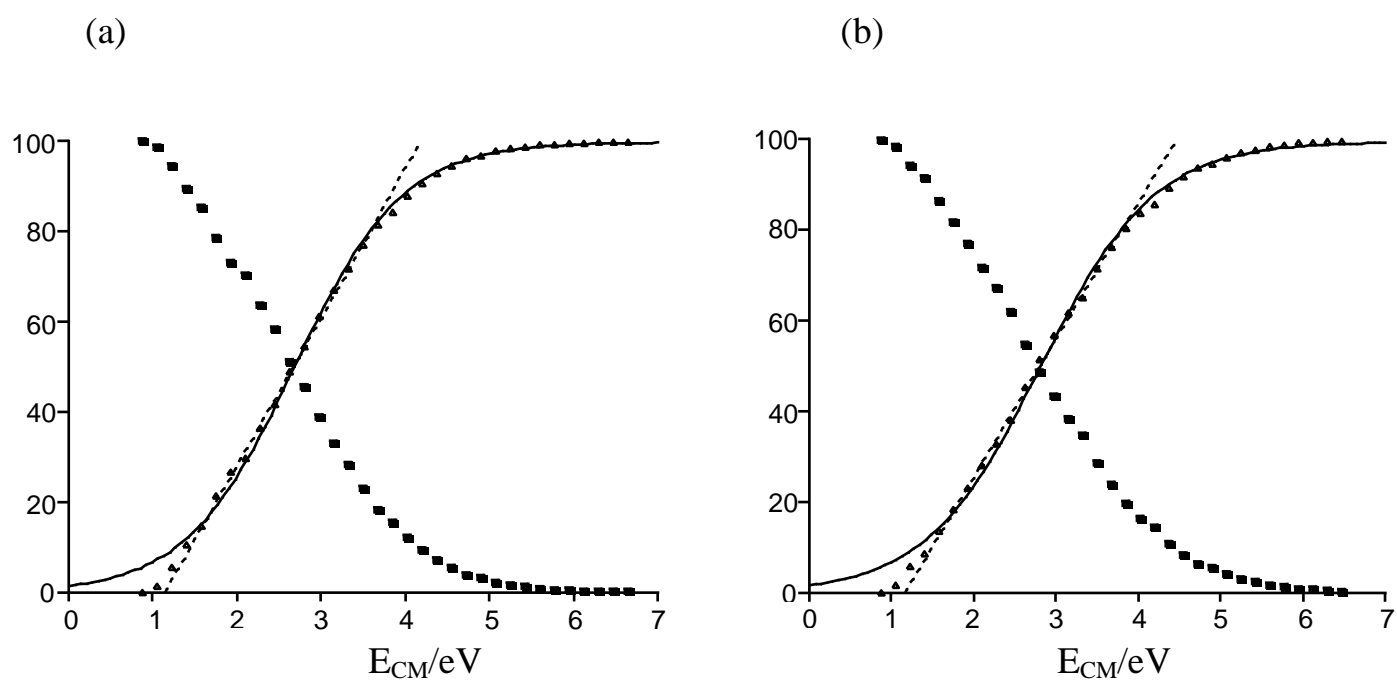

**Figure 1S.** Relative abundances of mass selected (a) HypH+ and (b) hypH+ ions (■,  $m/z$  132) to afford daughter ion (▲,  $m/z$  86) as a function of collision energy (center of mass,  $E_{CM}/\text{eV}$ ).

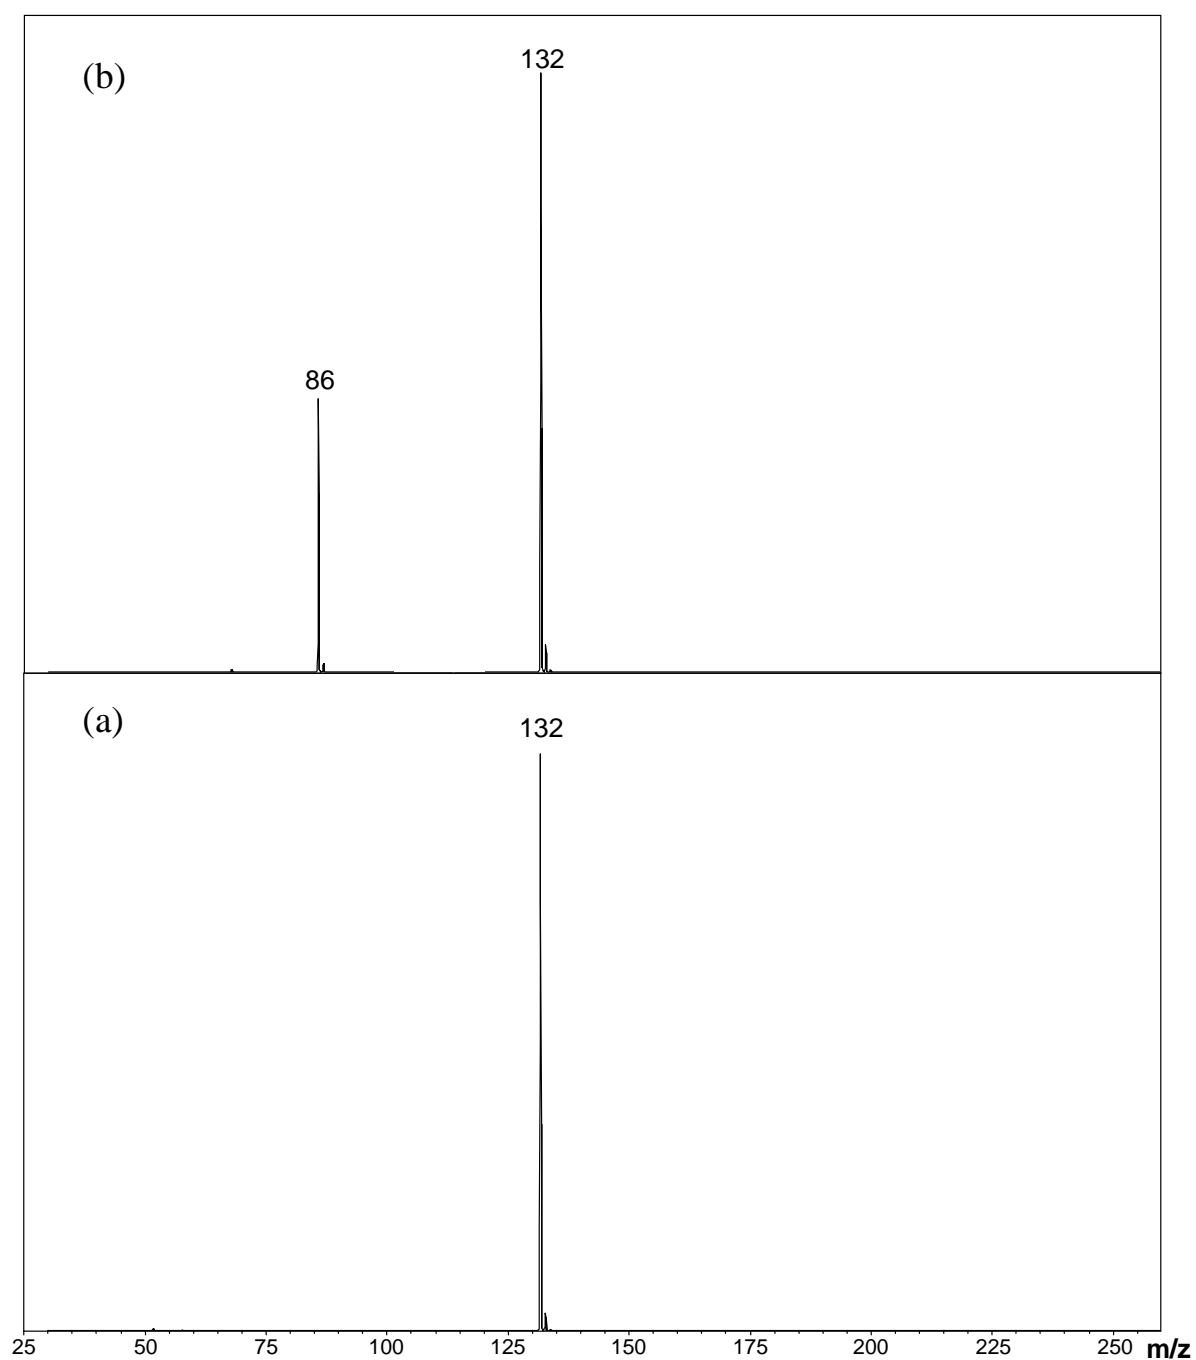

**Figure 2S.** Photodissociation mass spectrum of protonated (2S,4R)-4-hydroxyproline ( $\text{HypH}^+$ ) ions at  $m/z$  132 before (a) and after (b) irradiation with OPO/OPA IR frequency fixed at  $3550\text{ cm}^{-1}$ .

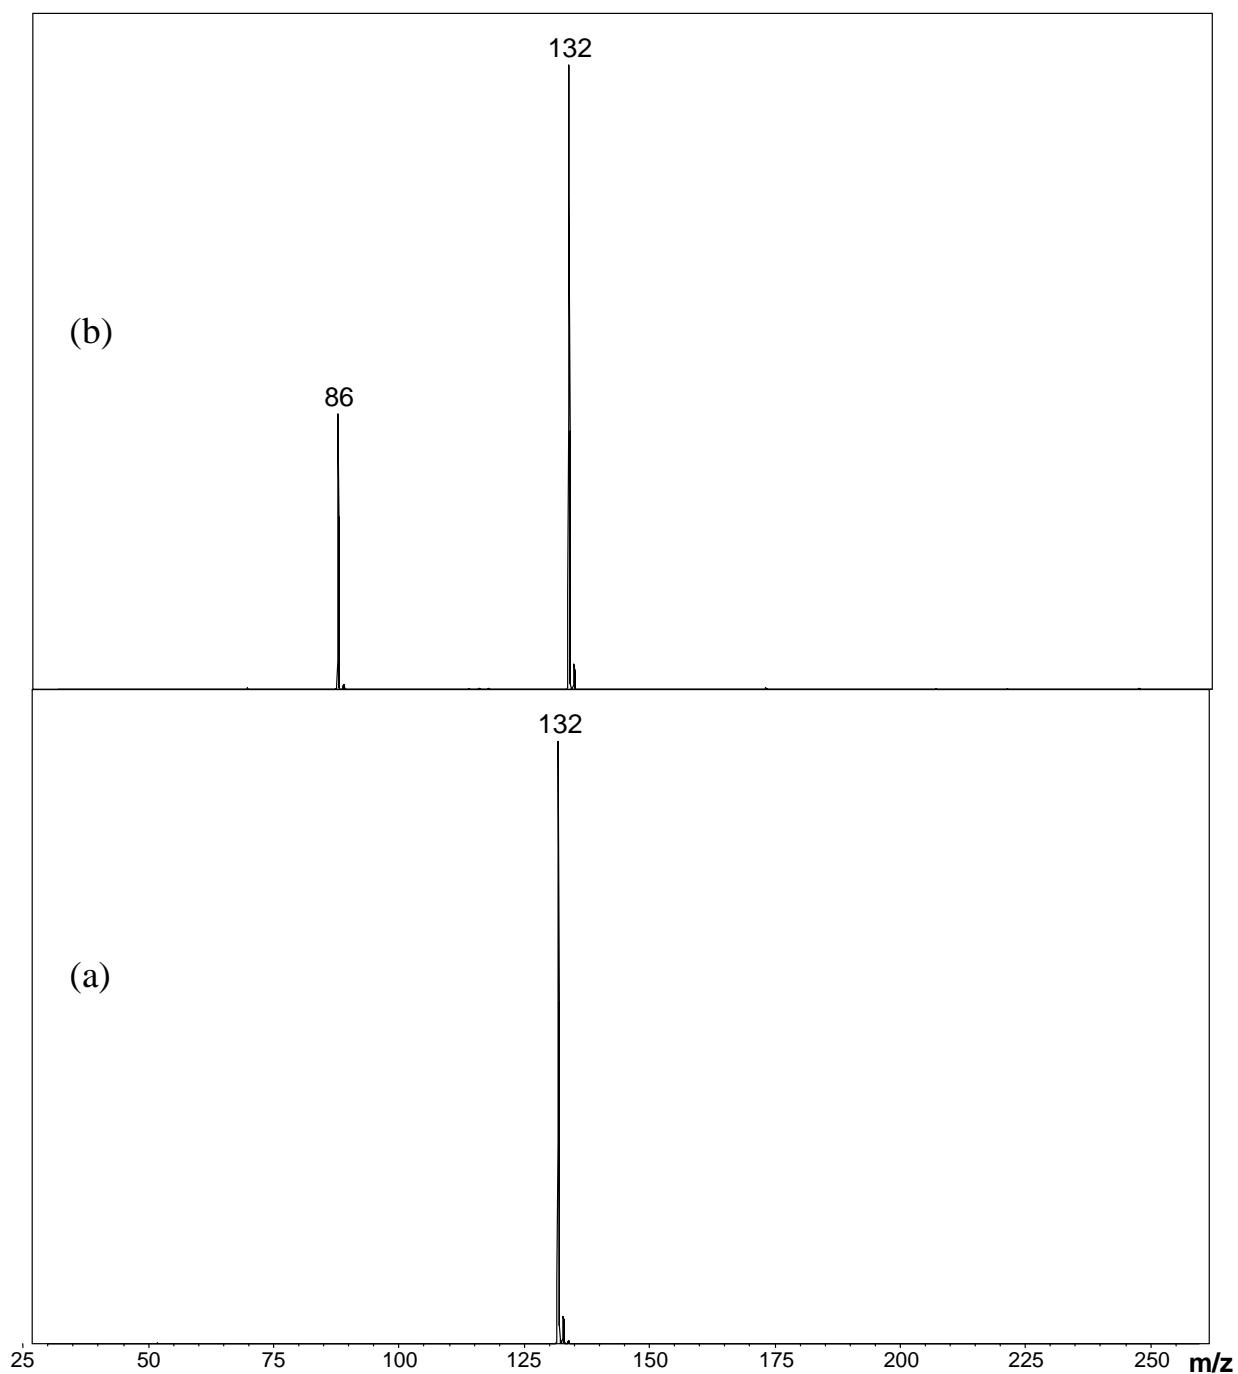

**Figure 3S.** Photodissociation mass spectrum of protonated (2S,4S)-4-hydroxyproline ( $\text{hypH}^+$ ) ions at  $m/z$  132 before (a) and after (b) irradiation with CLIO FEL IR frequency fixed at  $1770\text{ cm}^{-1}$ .

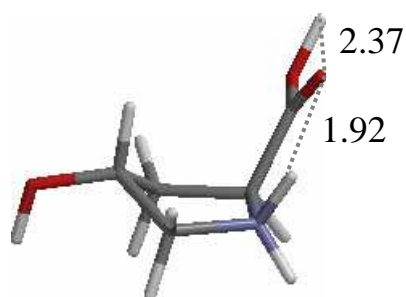

**R-endo Ic** (33.6)

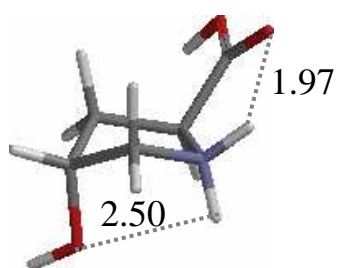

**R-exo IIIa** (34.8)

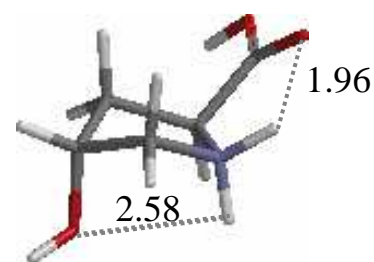

**R-exo IIIb** (35.2)

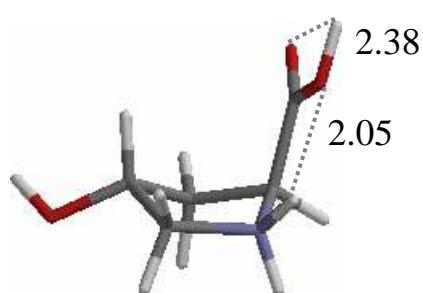

**R-endo IIa** (37.4)

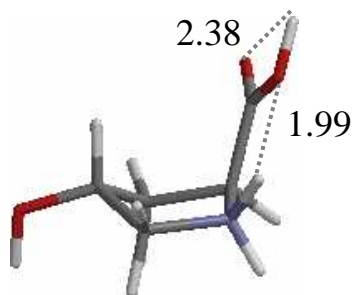

**R-endo IIc** (51.1)

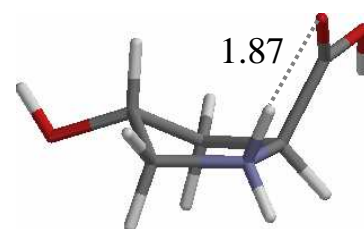

**R-endo IIIa** (55.5)

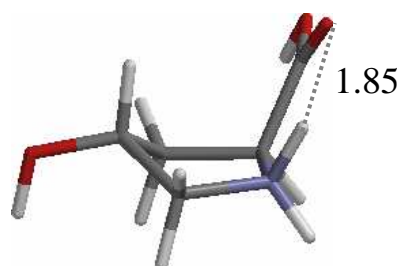

**R-endo IIIc** (69.1)

**Figure 4S.** Optimized structures and relative free energies ( $\text{kJ mol}^{-1}$ , in parentheses) at 298 K of protonated (2S,4R)-4-hydroxyproline ( $\text{HypH}^+$ ) conformers **R-endo Ic**, **R-exo IIIa**, **R-exo IIIb**, **R-endo IIa**, **R-endo IIc**, **R-endo IIIa**, **R-endo IIIc**, calculated at MP2/6-311+G\*\* level of theory.

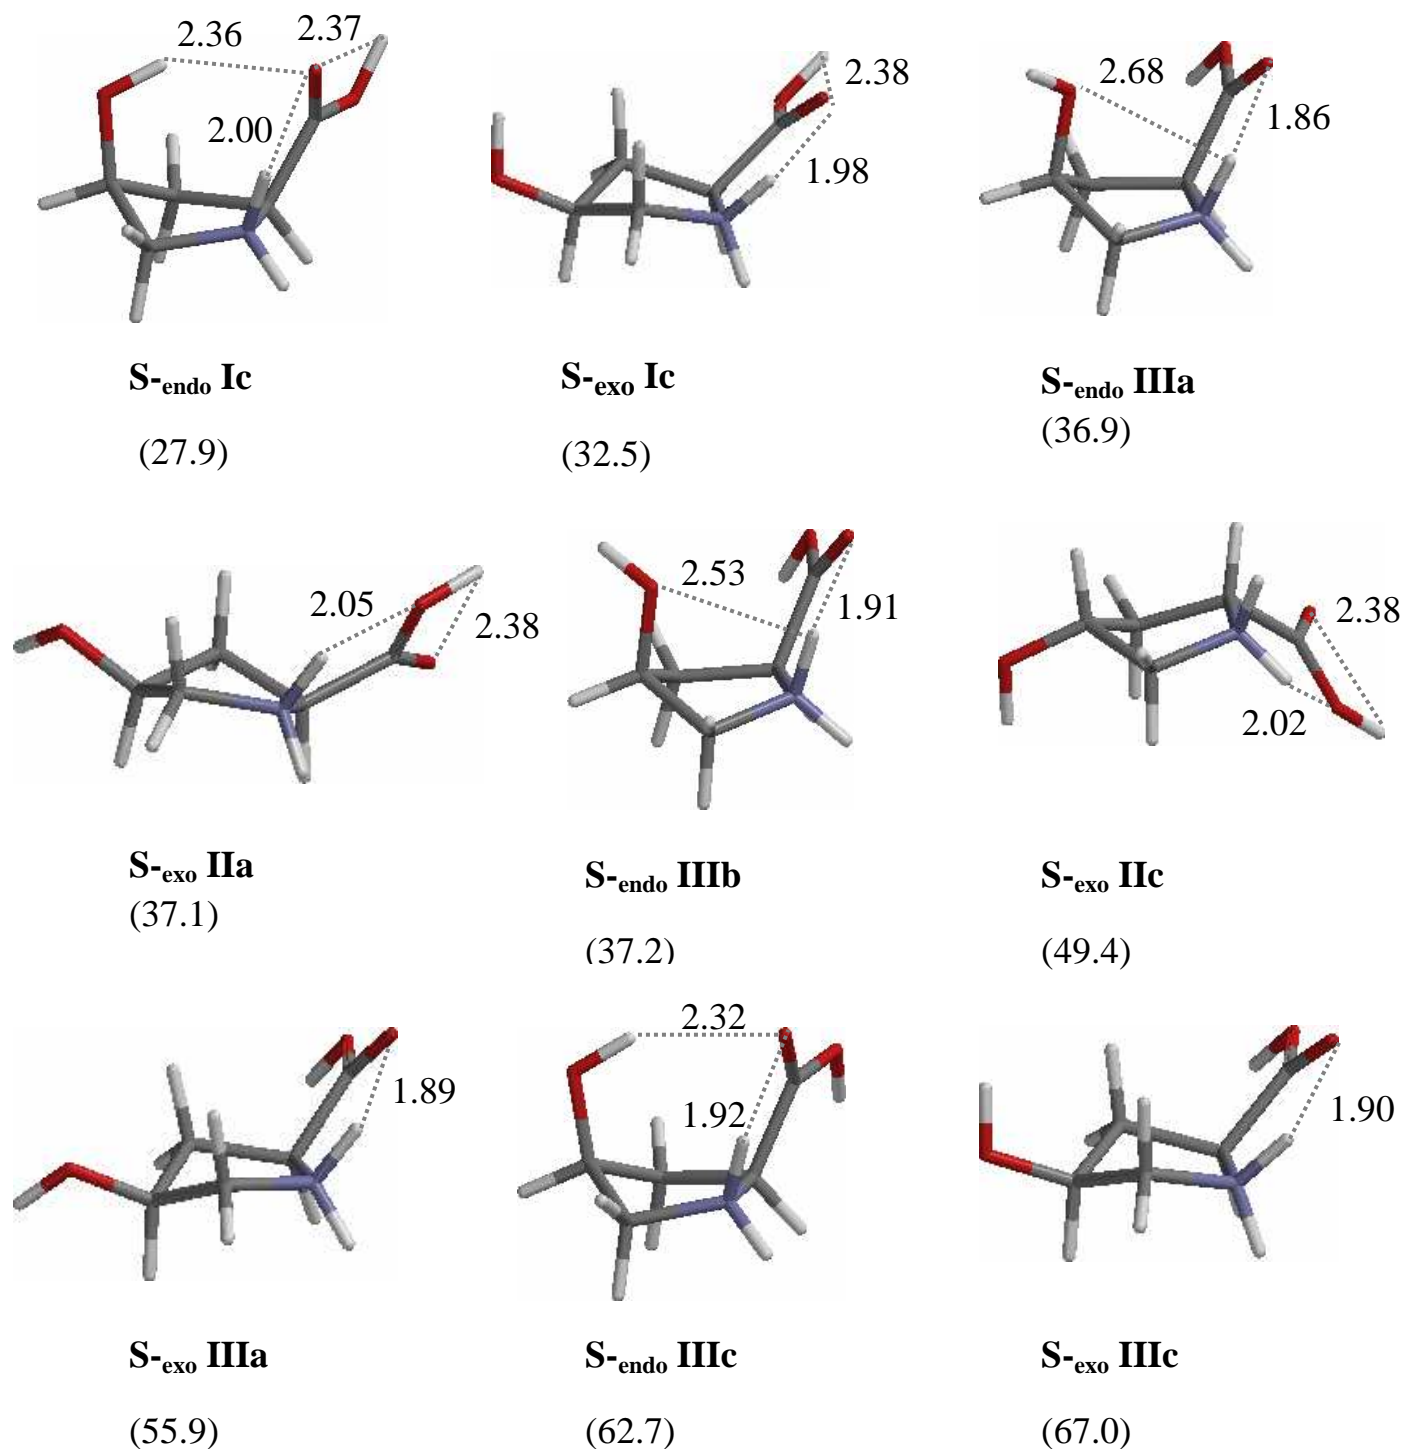

**Figure 5S.** Optimized structures and relative free energies (kJ mol<sup>-1</sup>, in parentheses) at 298 K of hypH<sup>+</sup> conformers **S-<sub>endo</sub> Ic**, **S-<sub>exo</sub> Ic**, **S-<sub>endo</sub> IIIa**, **S-<sub>exo</sub> IIa**, **S-<sub>endo</sub> IIIb**, **S-<sub>exo</sub> IIc**, **S-<sub>exo</sub> IIIa**, **S-<sub>endo</sub> IIIc**, **S-<sub>exo</sub> IIIc**, calculated at MP2/6-311+G\*\* level of theory. Hydrogen bond lengths, marked by dashed lines, are given in Å.

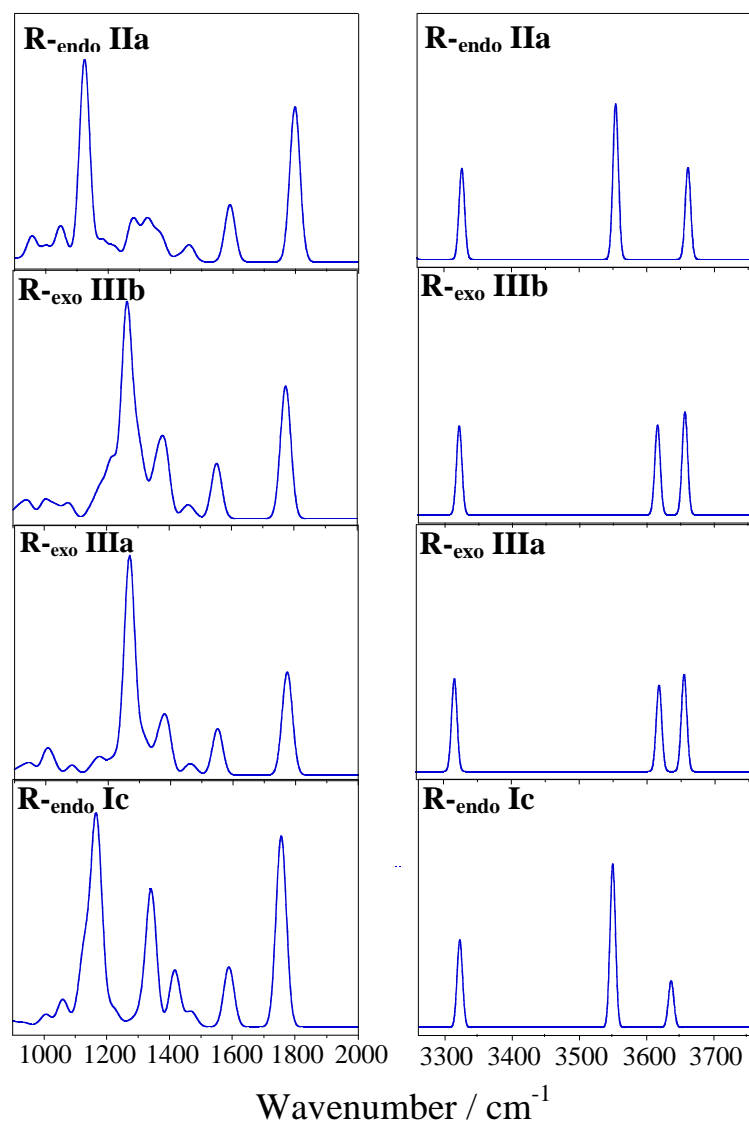

**Figure 6S.** Calculated IR spectra of protonated (2S,4R)-4-hydroxyproline (HypH<sup>+</sup>) structures **R-endo Ic**, **R-exo IIIa**, **R-exo IIIb**, **R-endo IIa**, at the MP2/6-311+G\*\* level.



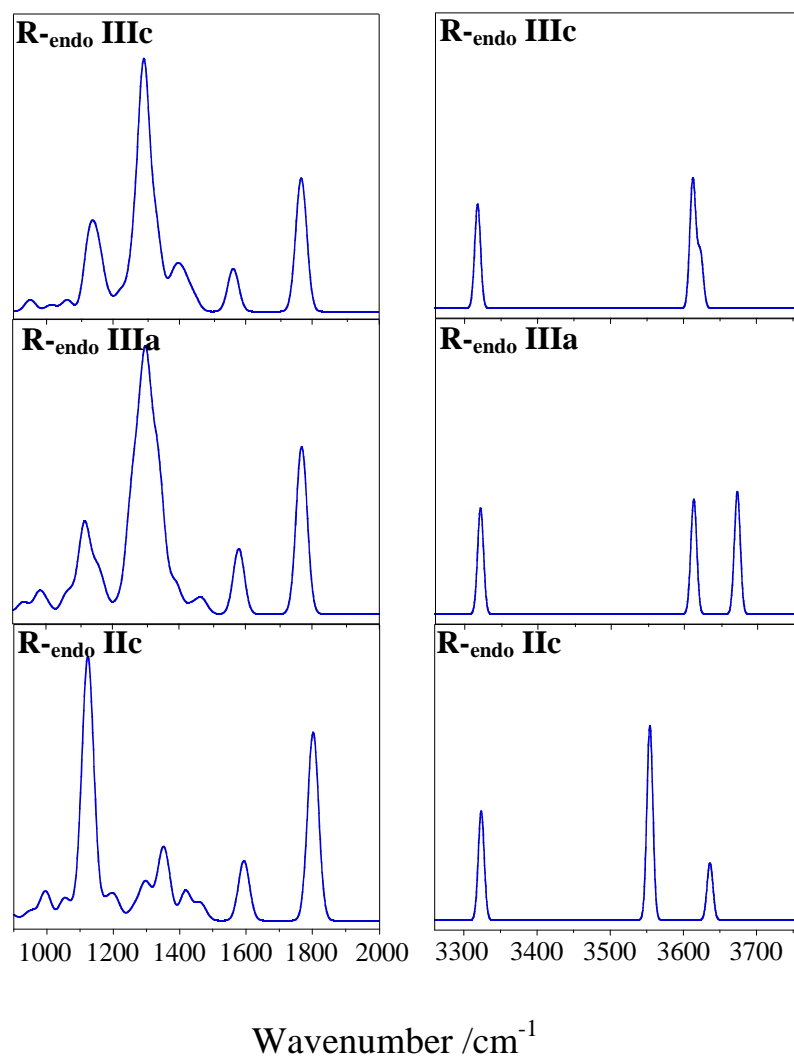

**Figure 7S.** Calculated IR spectra of protonated (2S,4R)-4-hydroxyproline (HypH<sup>+</sup>) structures **R-endo IIc**, **R-endo IIIa**, **R-endo IIIc** at the MP2/6-311+G\*\* level.

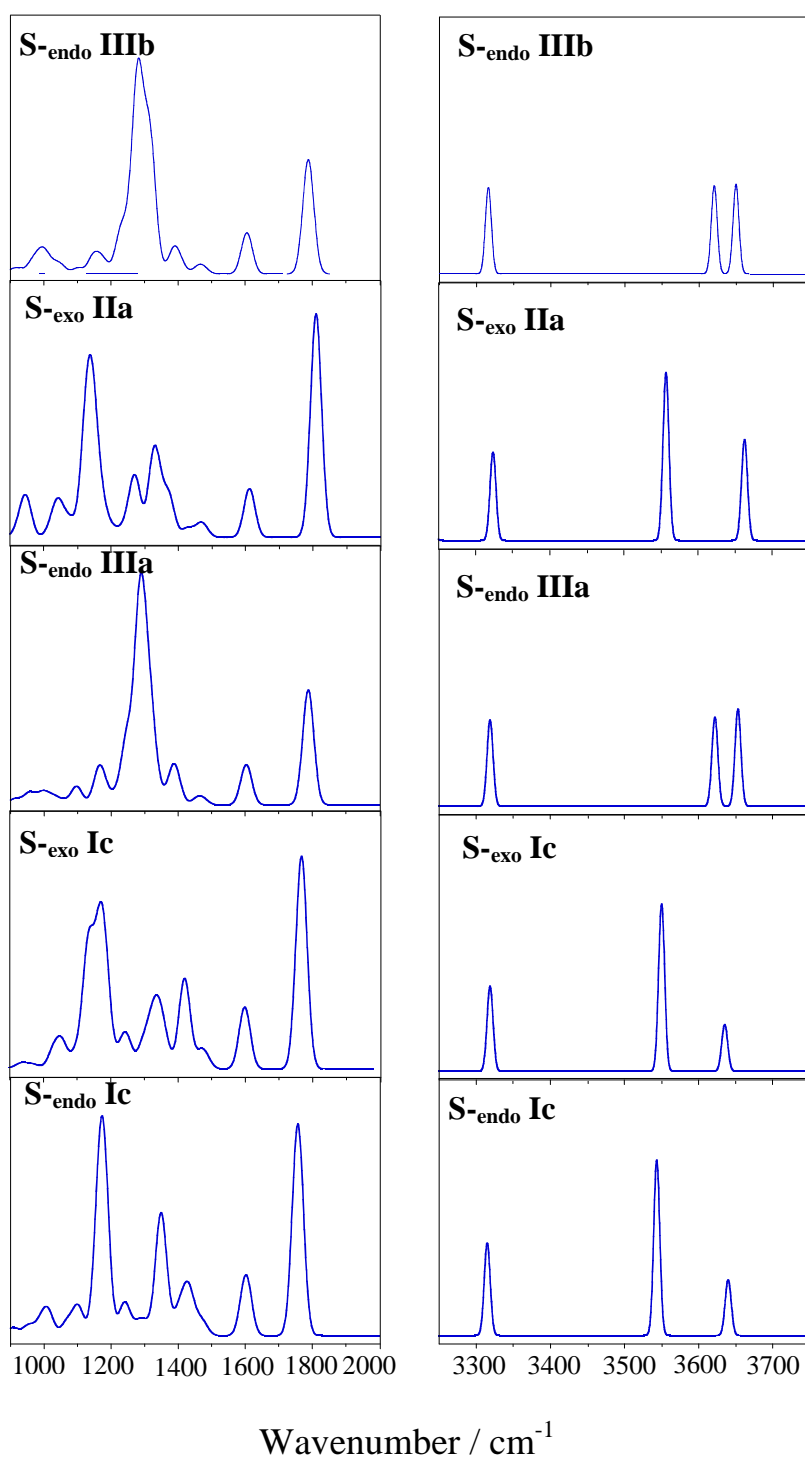

**Figure 8S.** Calculated IR spectra of protonated (2S,4S)-4-hydroxyproline (hypH<sup>+</sup>) structures **S-endo Ic**, **S-exo Ic**, **S-endo IIIa**, **S-exo IIa**, **S-endo IIIb** at the MP2/6-311+G\*\* level.

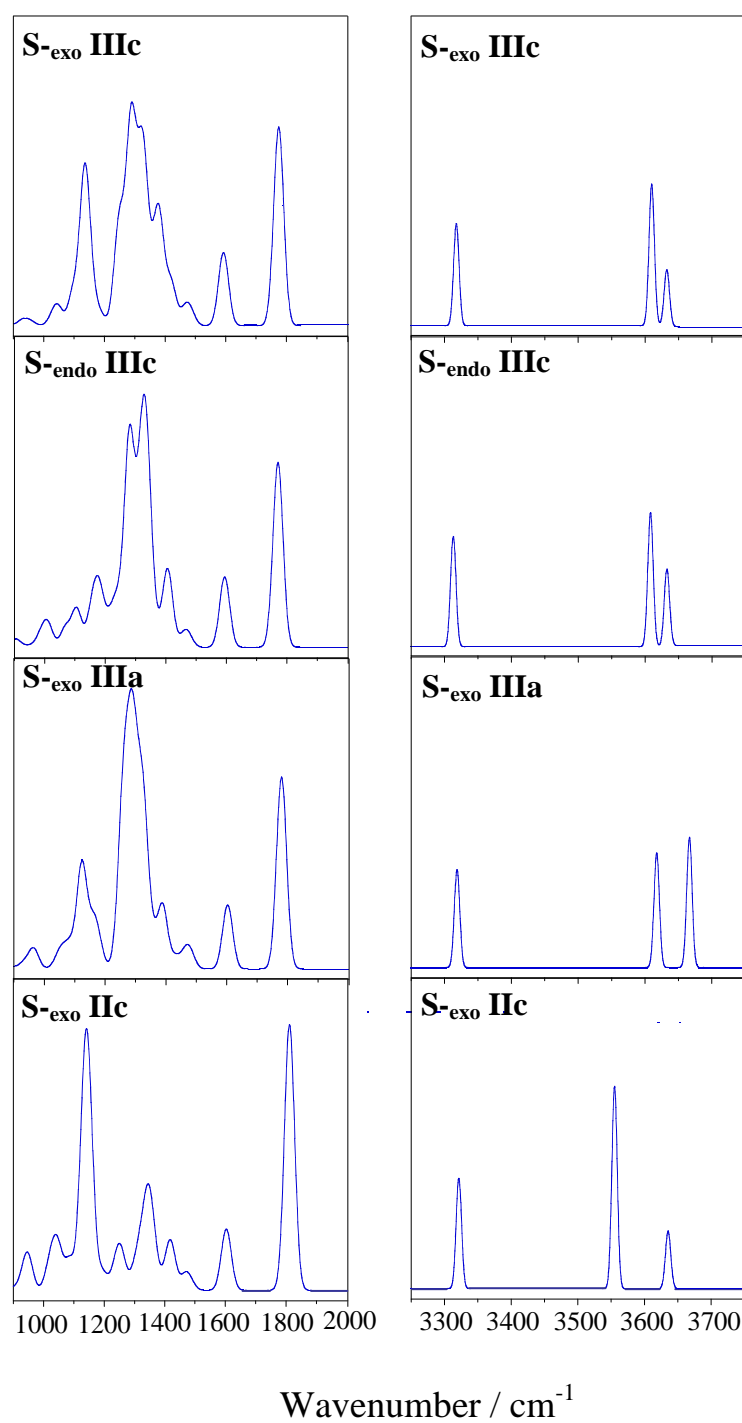

**Figure 9S.** Calculated IR spectra of protonated (2S,4S)-4-hydroxyproline (hypH<sup>+</sup>) structures **S-exo IIc**, **S-exo IIIa**, **S-endo IIIc**, **S-exo IIIc** at the MP2/6-311+G\*\* level.

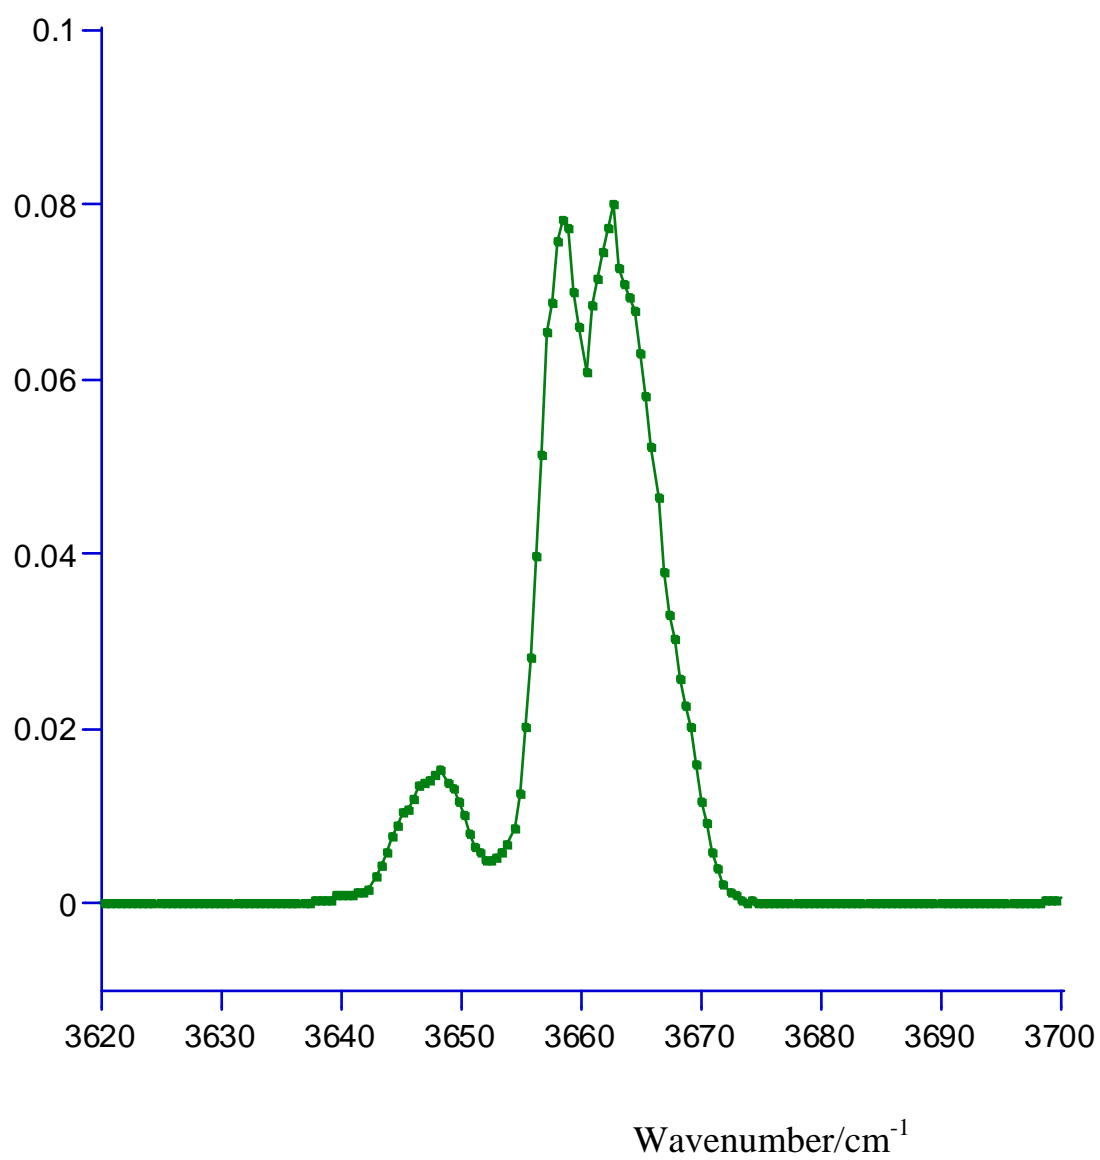

**Figure 10S.** Experimental IRMPD spectra of protonated (2S,4R)-4-hydroxyproline (HypH<sup>+</sup>) enlarged in the higher frequency OH stretch region, showing all data points.

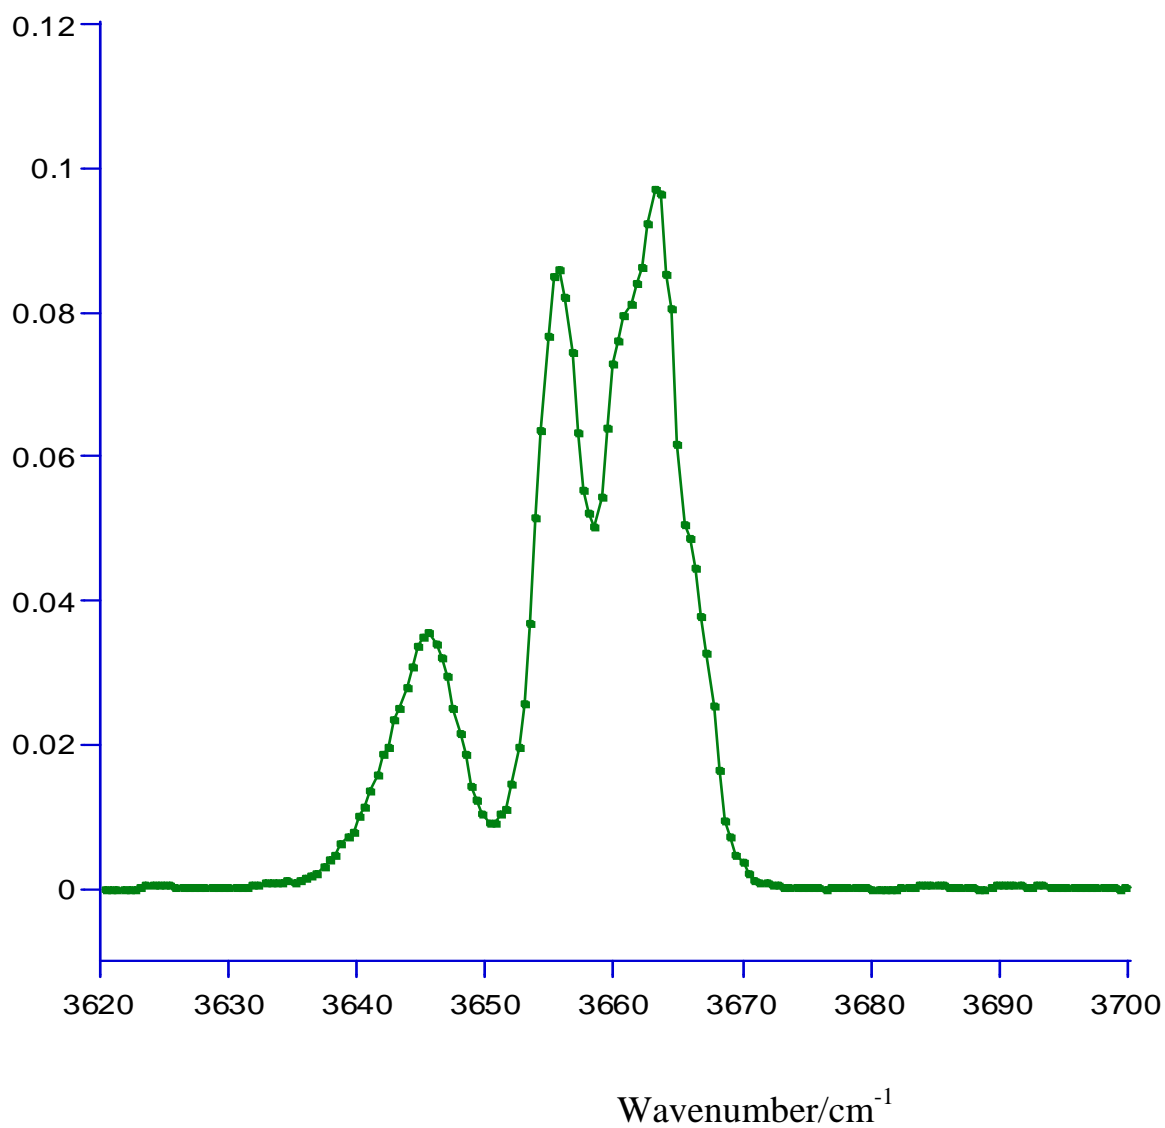

**Figure 11S.** Experimental IRMPD spectra of protonated (2S,4S)-4-hydroxyproline (hypH<sup>+</sup>) enlarged in the higher frequency OH stretch region, showing all data points.
